# Supplementary material for: 3D Hierarchical heterostructures of Bi2W1−xMoxO6 with enhanced oxygen evolution reaction from water under natural sunlight
Source: Royal Society of Chemistry journal article supplement (doi:10.1039/c8nj03304h), 2018-01-01
Supplement: c8nj03304h1.pdf [file c8nj03304h1.pdf]

## Electronic Supplementary Material (ESI)

### 3 D Hierarchical heterostructures of $\text{Bi}_2\text{W}_{1-x}\text{Mo}_x\text{O}_6$ with enhanced oxygen evolution reaction from water under natural sunlight

Aniruddha K. Kulkarni, Rajendra P. Panmand, Yogesh A. Sethi, Sunil R. Kadam, Deepak. R. Patil, Anil V. Ghule \* and Bharat B. Kale \*

Figure S1

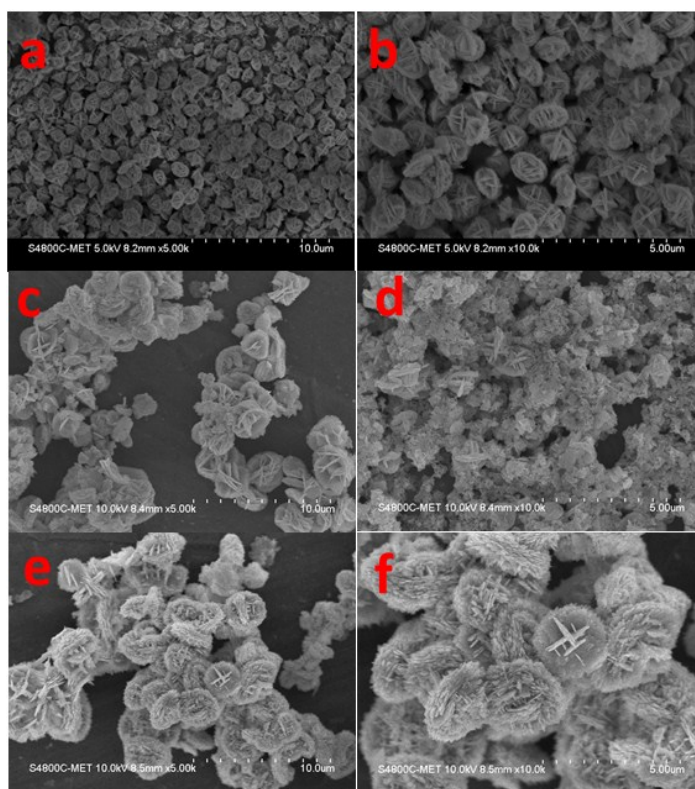

Figure S1: FE-SEM images (a, b)  $\text{Bi}_2\text{W}_{0.8}\text{Mo}_{0.2}\text{O}_6$  (c, d)  $\text{Bi}_2\text{W}_{0.4}\text{Mo}_{0.6}\text{O}_6$  and (e, f)  $\text{Bi}_2\text{W}_{0.2}\text{Mo}_{0.8}\text{O}_6$

# EDAX SPECTRA

a) S1

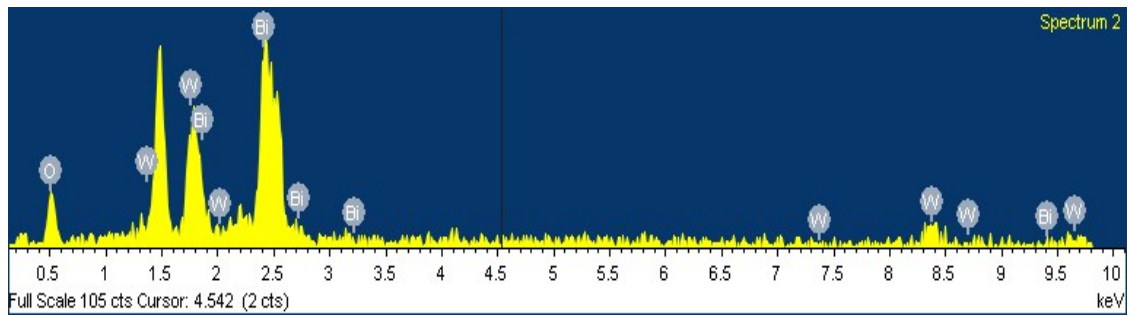

b) S3

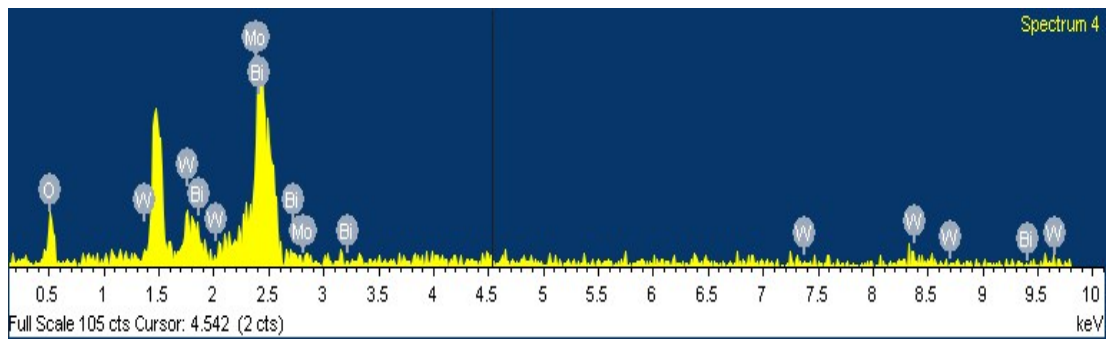

c) S4

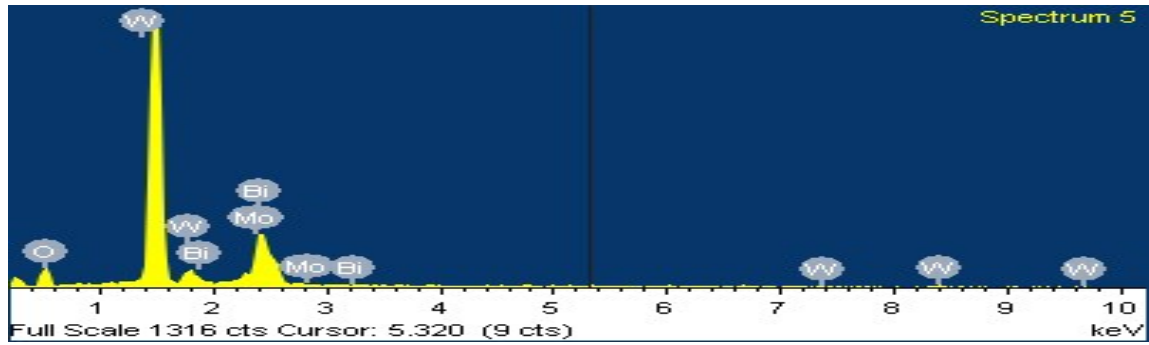

d) S5

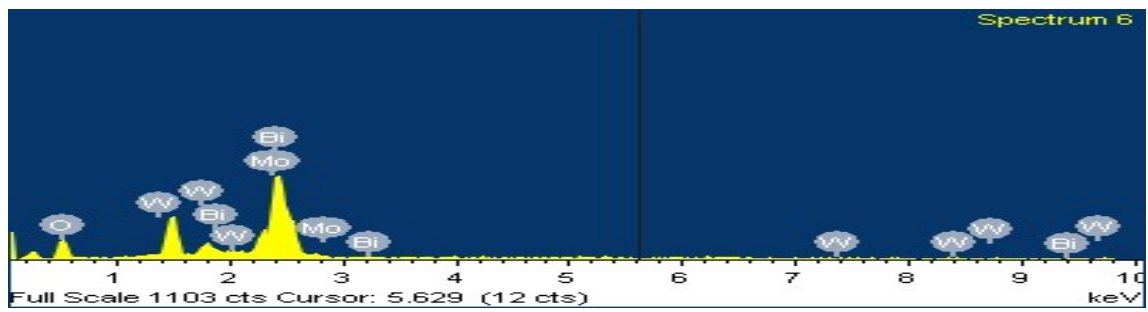

e) S6

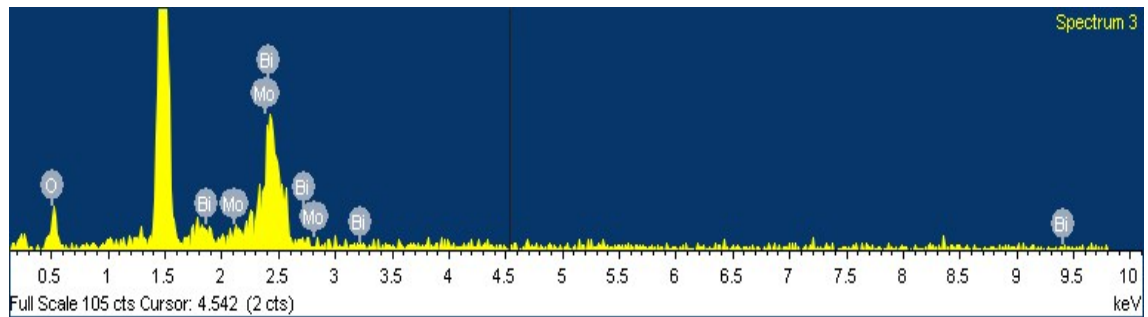

**Table 1 Elemental Composition from EDAX****S1**

| Element | Weight % | Atomic % |
|---------|----------|----------|
| O K     | 19.91    | 75.78    |
| W L     | 22.29    | 7.38     |
| Bi M    | 57.80    | 16.84    |

**S3**

| Element | Weight % | Atomic % |
|---------|----------|----------|
| O K     | 23.83    | 78.04    |
| W L     | 8.72     | 4.76     |
| Mo L    | 8.15     | 2.32     |
| Bi M    | 59.30    | 14.87    |

**S4**

| Element | Weight % | Atomic % |
|---------|----------|----------|
| O K     | 29.75    | 83.20    |
| W L     | 5.40     | 2.52     |
| Mo L    | 13.37    | 3.25     |
| Bi M    | 51.47    | 11.02    |

**S5**

| Element | Weight % | Atomic % |
|---------|----------|----------|
| O K     | 25.96    | 79.46    |
| W L     | 7.10     | 1.89     |
| Mo L    | 10.75    | 5.49     |
| Bi M    | 56.19    | 13.48    |

**S6**

| Element | Weight % | Atomic % |
|---------|----------|----------|
| O K     | 27.91    | 81.41    |
| Mo L    | 9.48     | 4.61     |
| Bi M    | 62.61    | 13.98    |

Figure S2

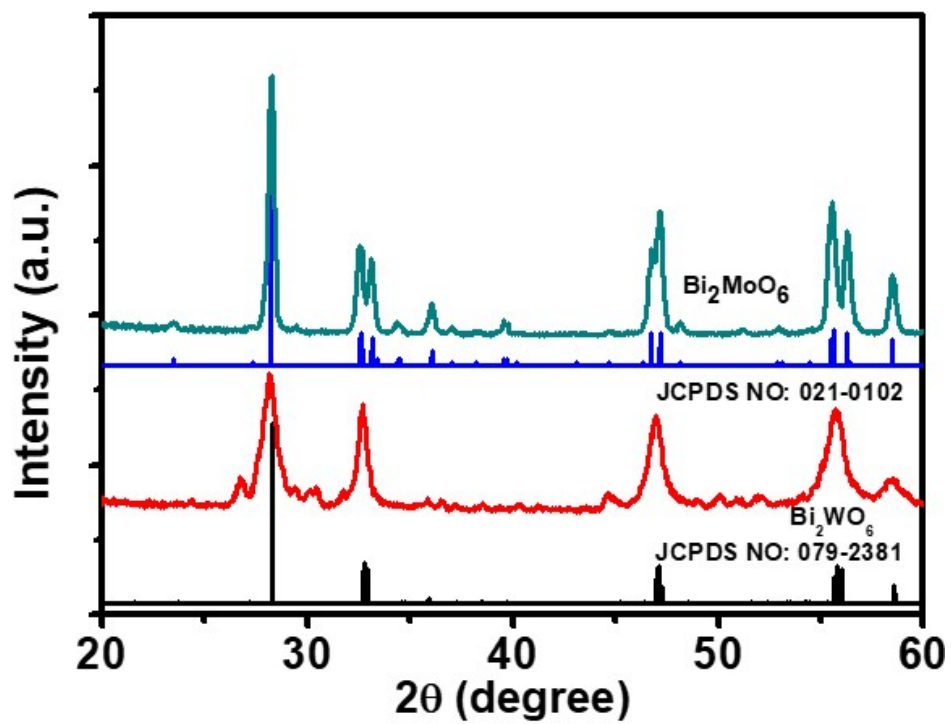

Figure S2: Comparative XRD patterns of  $\text{Bi}_2\text{WO}_6$  and  $\text{Bi}_2\text{MoO}_6$  with standard XRD pattern

**Figure S3**

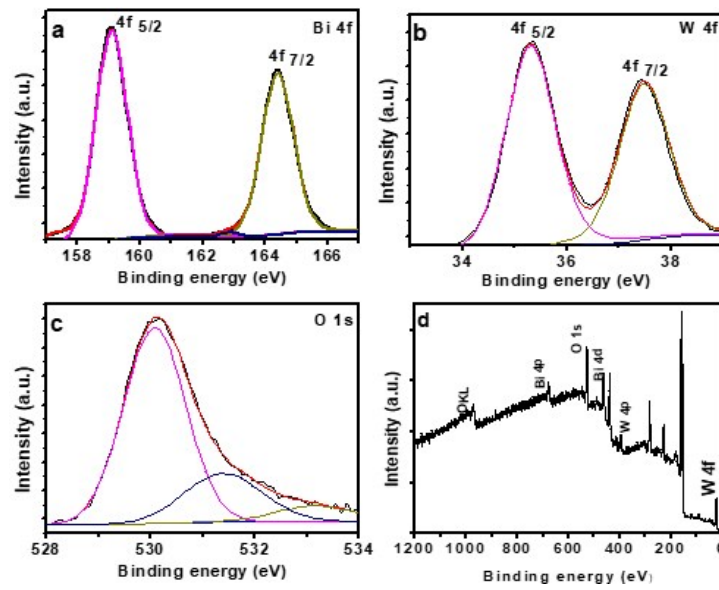

**Figure S3:** XPS spectra of  $\text{Bi}_2\text{WO}_6$  (S1) a) Bi 4f b) W 4f c) O 1s d) survey spectrum

**Figure S4**

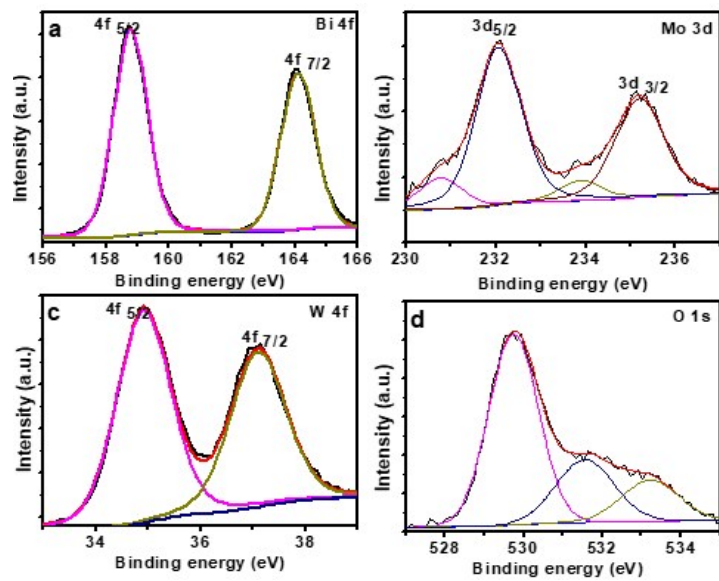

**Figure S4:** XPS spectra of  $\text{Bi}_2\text{W}_{0.6}\text{Mo}_{0.4}\text{O}_6$  (S3) a) Bi 4f b) Mo 3d c) W 4f d) O 1s

**Figure S5**

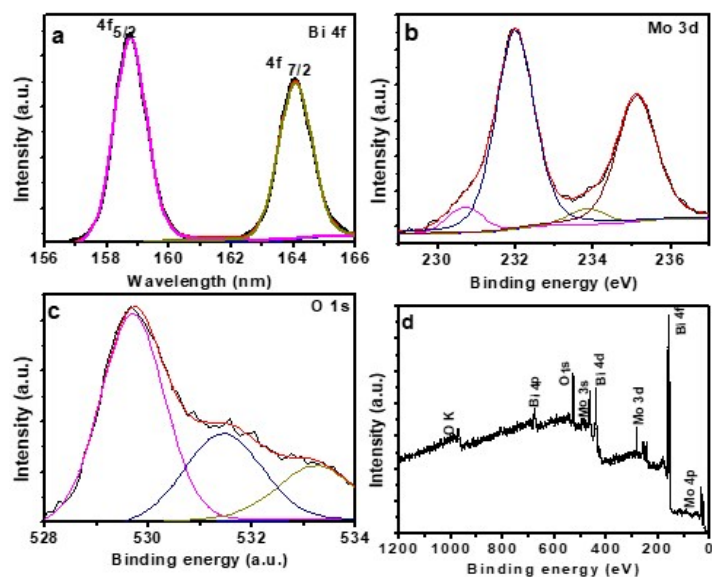

**Figure S5:** XPS spectra of  $\text{Bi}_2\text{MoO}_6$  (S6) a) Bi 4f b) Mo 3d c) O 1s d) Survey spectrum

**Table 2** Sample composition of Bi, Mo, W and O from  $\text{Bi}_2\text{W}_{1-x}\text{Mo}_x\text{O}_6$  from XPS

| Compound | Bi    | W     | Mo   | O     |
|----------|-------|-------|------|-------|
| S1       | 22.18 | 10.30 | -    | 67.51 |
| S3       | 20.80 | 5.07  | 3.30 | 70.82 |
| S6       | 19.58 | -     | 7.72 | 72.70 |

**Table 3** Composition of each precursor for synthesis of  $\text{Bi}_2\text{W}_{1-x}\text{Mo}_x\text{O}_6$

| Sample code | $\text{Bi}(\text{NO}_3)_3$ in (mm) | $\text{Na}_2\text{WO}_4$ in (mm) | $\text{Na}_2\text{MoO}_4$ in (mm) | % of Bi:W:Mo (from ICP-AES)   |
|-------------|------------------------------------|----------------------------------|-----------------------------------|-------------------------------|
| S1          | 0.96                               | 0.29                             | -                                 | Bi 62.22%, W 23.41%           |
| S2          | 0.96                               | 0.23                             | 0.048                             |                               |
| S3          | 0.96                               | 0.17                             | 0.096                             | Bi 63.15%, W 12.1 %, Mo 8.48% |
| S4          | 0.96                               | 0.11                             | 0.144                             |                               |
| S5          | 0.96                               | 0.05                             | 0.19                              |                               |

|    |      |      |   |                      |
|----|------|------|---|----------------------|
| S6 | 0.96 | 0.25 | - | Bi 63.06%, Mo 17.11% |
|----|------|------|---|----------------------|

Figure S6

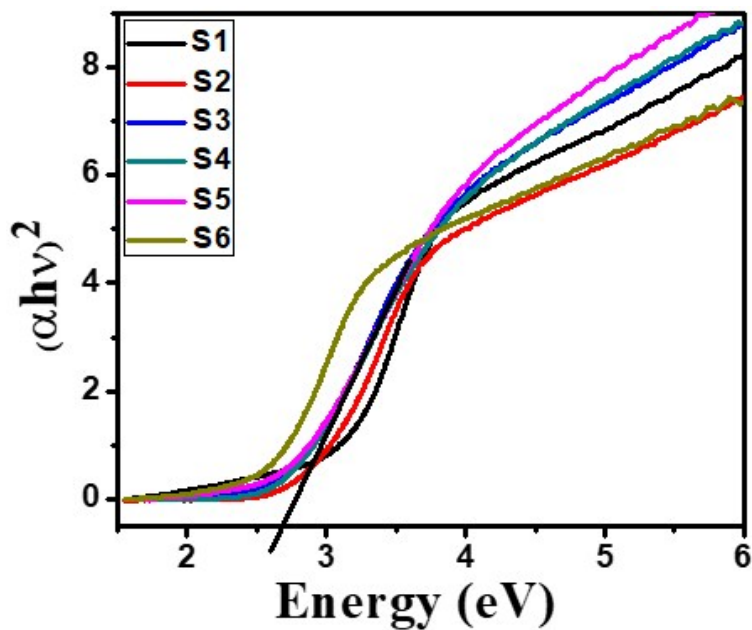

Figure S6: Tauc plot of samples S1) ( $\text{Bi}_2\text{WO}_6$ ), S2) ( $\text{Bi}_2\text{W}_{0.8}\text{Mo}_{0.2}\text{O}_6$ ), S3) ( $\text{Bi}_2\text{W}_{0.6}\text{Mo}_{0.4}\text{O}_6$ ), S4) ( $\text{Bi}_2\text{W}_{0.4}\text{Mo}_{0.6}\text{O}_6$ ), S5) ( $\text{Bi}_2\text{W}_{0.2}\text{Mo}_{0.8}\text{O}_6$ ) and S6) ( $\text{Bi}_2\text{MoO}_6$ )

Figure S7

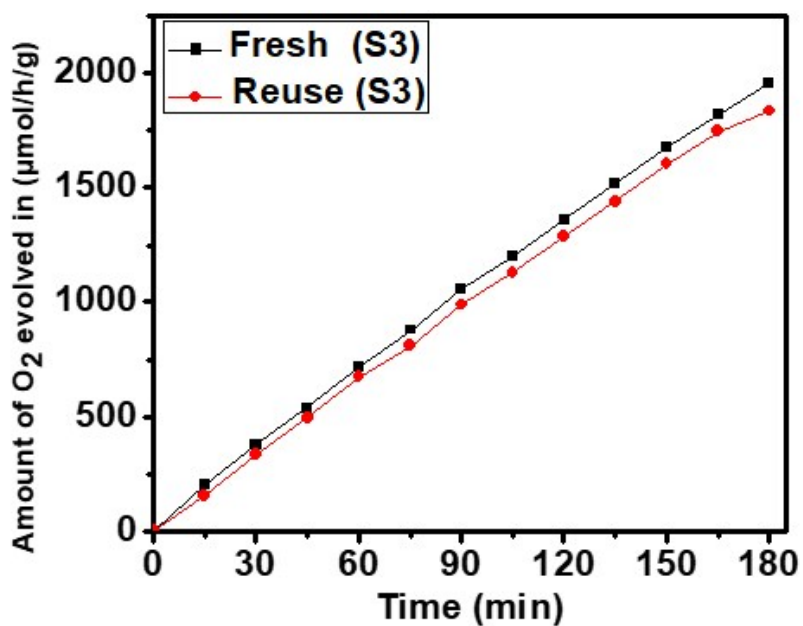



Figure S7: Recycle study of  $\text{Bi}_2\text{W}_{0.6}\text{Mo}_{0.4}\text{O}_6$  (S3) for photocatalytic oxygen evolution reaction

---

Figure 8

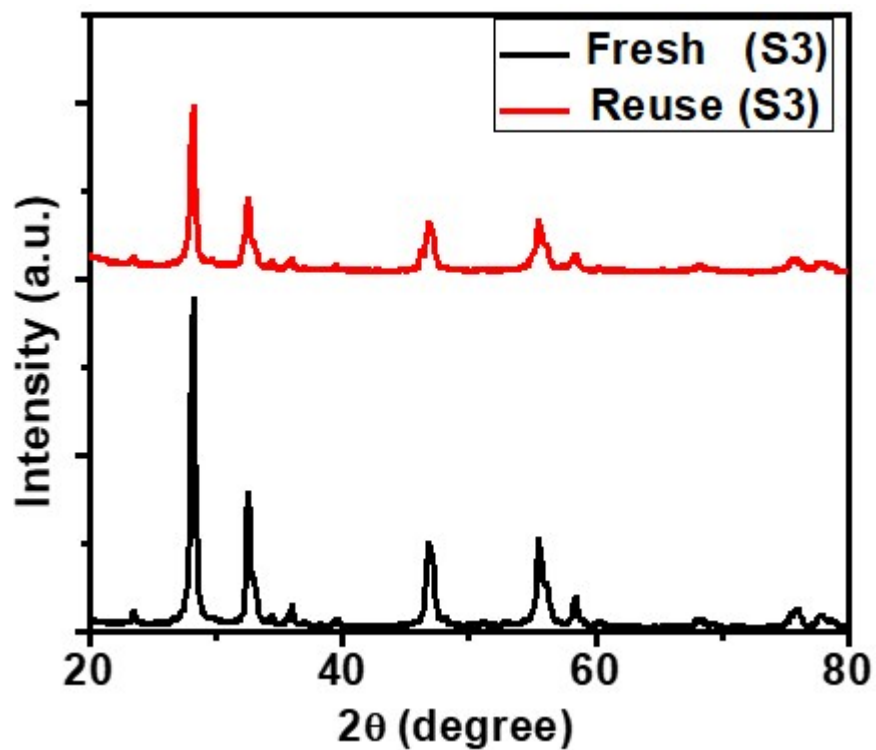

Figure 8: XRD pattern of sample (S3): after photocatalytic oxygen evolution reaction

---

Figure 9

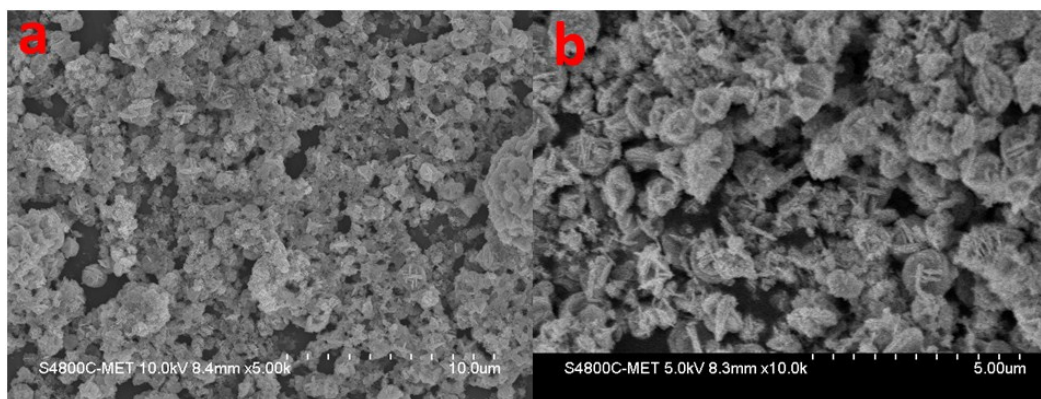

Figure 9: FESEM images of sample (S3) after photocatalytic reaction

---

**Table 4 A comparison study of the photocatalysts in this work and previous reported BiVO<sub>4</sub> based photocatalysts for water oxidation reaction.**

| Photocatalyst                      | Light source | Wavelength(nm) | Sacrificial agent                                  | Oxygen evolution rate (μmol/h/g) | References   |
|------------------------------------|--------------|----------------|----------------------------------------------------|----------------------------------|--------------|
| Bi <sub>2</sub> MoO <sub>6</sub>   | 300 W Xe     | >300           | Ag(NO) <sub>3</sub>                                | 127                              | 1            |
| Bi <sub>2</sub> WO <sub>6</sub>    | 450 W Xe     | >420           | Ag(NO) <sub>3</sub>                                | 34                               | 2            |
| Mo-BiVO <sub>4</sub>               | 300 W Xe     | > 420          | Ag(NO) <sub>3</sub>                                | 500                              | 3            |
| BiVO <sub>4</sub>                  | 300 W Xe     | >300           | Ag(NO) <sub>3</sub>                                | 82.8                             | 4            |
| Fe-BiVO <sub>4</sub>               | 300 W Xe     | >300           | Ag(NO) <sub>3</sub>                                | 50                               | 4            |
| Fe/Mo BiVO <sub>4</sub>            | 300 W Xe     | >300           | NaOH/Na <sub>2</sub> S <sub>2</sub> O <sub>8</sub> | 191.5                            | 5            |
| Bi <sub>2</sub> WO <sub>6</sub>    | Sunlight     | >300           | Ag(NO) <sub>3</sub>                                | 116.5                            | Present work |
| Bi <sub>2</sub> MoO <sub>6</sub>   | Sunlight     | >300           | Ag(NO) <sub>3</sub>                                | 81.2                             | Present work |
| MO-Bi <sub>2</sub> WO <sub>6</sub> | Sunlight     | >300           | Ag(NO) <sub>3</sub>                                | 652                              | Present work |

## References

- 1) Y. Shimodaira, H. Kato, H. Kobayashi, A. J. Kudo, Phys. Chem. B 2006, **110**, 17790–17797.
- 2) A. Kudo, S. Hijii, Chem. Lett. 1999, **10**, 1103–1104.
- 3) K. P. S. Parmar, H. J. Kang, A. Bist, P. Dua, J. S. Jang and J. S. Lee, ChemSusChem, 2012, **10**, 1926-1934.
- 4) S. M. Thalluri, C. M. Suarez, S. Hernandez, S. Bensaid, G. Saracco, N. Russo, Chem. Eng. J., 2014, **245**, 124-132.
- 5) R. Liu, J. Ren, D. Zhao, J. Ning, Z. Zhang, Y. Wang, Y. Zhong, C. Zheng, and Y. Hua, Inorg. Chem Front., 2017, **4**, 2045-2054.
